# Supplementary material
Source: Springer Nature journal article supplement (https://www.springerprofessional.de/resource/supplementary/40327_2013_5_MOESM3_ESM.pdf/10801436)
Supplement: MOESM3 [file 10801436]

1 Feature detection and extraction

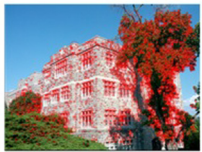

2 Feature matching

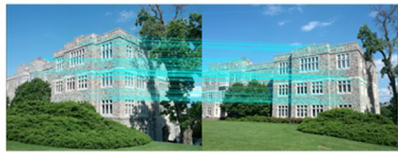

3 Structure-from-Motion

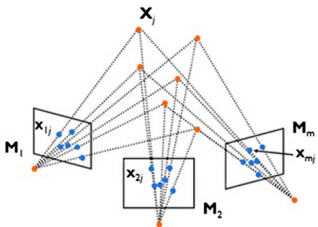

Recover position of 3D points ( $X_j$ ) and camera matrices\* ( $M_1, \dots, M_m$ ) using correspondences between feature points in the images ( $x_{1j}, \dots, x_{mj}$ )
